CORRECTION

# Correction: A cluster-randomized controlled study to evaluate a team coaching concept for improving teamwork and patient-centeredness in rehabilitation teams

Mirjam Körner, Leonie Luzay, Anne Plewnia, Sonja Becker, Manfred Rundel, Linda Zimmermann, Christian Müller

The following information is missing from the Funding section: The article processing charge was funded by the German Research Foundation (DFG) and the University of Freiburg in the funding programme Open Access Publishing.

## Reference

1. Körner M, Luzay L, Plewnia A, Becker S, Rundel M, Zimmermann L, et al. (2017) A cluster-randomized controlled study to evaluate a team coaching concept for improving teamwork and patient-centeredness in rehabilitation teams. PLoS ONE 12(7): e0180171. <https://doi.org/10.1371/journal.pone.0180171> PMID: [28704377](https://pubmed.ncbi.nlm.nih.gov/28704377/)

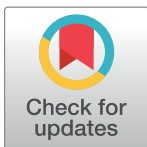

## OPEN ACCESS

**Citation:** Körner M, Luzay L, Plewnia A, Becker S, Rundel M, Zimmermann L, et al. (2017) Correction: A cluster-randomized controlled study to evaluate a team coaching concept for improving teamwork and patient-centeredness in rehabilitation teams. PLoS ONE 12(12): e0190338. <https://doi.org/10.1371/journal.pone.0190338>

**Published:** December 21, 2017

**Copyright:** © 2017 Körner et al. This is an open access article distributed under the terms of the [Creative Commons Attribution License](https://creativecommons.org/licenses/by/4.0/), which permits unrestricted use, distribution, and reproduction in any medium, provided the original author and source are credited.
